# Supplementary material for: ASR1 and ASR2, Two Closely Related ABA-Induced Serine-Rich Transcription Repressors, Function Redundantly to Regulate ABA Responses in Arabidopsis
Source: MDPI journal article supplement (doi:10.3390/plants12040852), 2023-02-14
Supplement: s1 [file s1]

**File S1** Amino acid sequences of ASRs and their homologs used for phylogenetic analysis.

>ASR1

MAAGSMDGIFRNIFEGCISSCDSSIQRPPYHKNCGCALHERSRGGGSATPCRHRGRSEVVMFPIQRS  
WSEGNLALHLASSSSSSNLQSLSSSSSISTLASLSSTVSDIDSPI

>ASR2

MAADGIFRSIFEGCISGLDSAIERRPYHKNCGCALHDKSSGAGKNQNQRRPPSCRRHGSSESISFPI  
RRSWSEGNIMAMNLFSSSSSSNLQSLSSSSSLNLASDLPVDNAATEEPSRSNKQLRWTIDEGED  
D

>Solyc12g010400.1 (*Solanum lycopersicum*)

MATGAAGDAIFRGVFEGSISGHDLEISKRPYHRNCGCALHKSRCNCSHSSRNMNISYPIRRSWSE  
GCLSLVAAASAAASGHSSPCSSPTVTVADMSKRNLPLVNEGEDLVFRKEMKNIKRTLPR

>Solyc07g007050.1

MATGAAGDGLFRGVFDGCISGHDMGIQQRPYHRNCCKLHKSRCNCSHSSRCTNVSYPIRRSWS  
ESCLSLAAGAYAGASGHSSTCSPASGVGGSDLTGKKNLVRSTSDEYDDVVLFKV

>Solyc07g007080.1

MATVAAEMMLQCVFDGSLMSDMNIERRPYHKNCSCAMHKQKGENTTTTCVHGRNVSFPKRQN  
QKDMTSLIAASRFSSPSSSCNNSVVTSTV

>Glyma.09G094900.1 (*Glycine max*)

MASAAAADGLFRPIYEGCISAYDNDVERRPYHKNCGCALHKSRRNSSRACRHKLPKCNNVSYP  
MRRAWSEGNLSMVSTTSTHSSPSSSPAAGFRPQHDEEGNTKNKLVVLFEMNN

>Glyma.15G202600.1

MAAADADGLFRPIYEGCISAYDNDVERRPYHKNCGCALHKSRRNSRACRHKLPKCNNVSYPMR  
RAWSEGLSLMASATTAHSSPSSSPAAGFRPQHDEEGNSNKLGVLFEM

>Glyma.13G157000.1

MATGATPDGLFWSVYEGCISCYDNCVERRPYHRNCGCALHNKSLINCTHKLPRCNNVSYPMR  
AWSEGLVLAASSSSPSQVATGGRPQPSLANVEEENKNCFS

>Glyma.17G104600.1

MATGAAPDGLFWSVVYEGCISGYDNCVERRPYHRNCGCALHNTSLINRTHKLPRCNNVSYPMR  
RAWSEGLVLATSSSSSPSQVATGGRPQPSLANVEEENKNCFN

>Glyma.17G104700.1

MATGACQMMFQCVFEGSISLHDMEIERRPYHKNCGCALHNLNDGICSKACPQQRYVSFSKKT  
WTDYCMHTTASKFSSHLSFLSKTRH

>Glyma.13G157100.1

MATGACQMMFQCVFEGSISLHDMEIERRPYHKNCGCALHNLNDGICSKACPQQRYISFRKKT  
SWTDCCMHTTASKFYSSRSFLSKTRQ

>Potri.018G113700.1 (*Populus trichocarpa*)

MATGSADGFFRHVYDGLSSGDMGIDRRPYHRNCRCALHKSKEKNC  
PHALPRCKNVSYPIKRSWSEGLALMIANSSSSSCHSSPSSPSLQAGKSTSTPSHQ  
RRLSHDLEDKLAL

>Potri.006G189600.1

MAAGAADGFFRYVHDGCLSGGEMGIDRRPYHRNCSCALHKSKEKNC  
SHAMSRYKNVSYPIKRCWSEGLALMVANSSSCCHSPSSPSLQAGKSTATPHQ  
RRLSHDLDEQVCSFKV

>Potri.018G113900.1

MFIAASDIMFRCVFDGCISVDNMEIERRPYHRNCSCALHKMEGGSS  
TGFP LPRNMFYPPKKQSWRRCSLSLATPSILLAYQLKVNSFSYTNVNLIFV  
FQKYILFMKFLFVSNLQYEIQKKTRS

>Potri.006G189800.1

MFSAASDIMFRCVFDECISMDSMETERRPYHRNCNCALHKSKEKNC  
SSTSPQPRNILFPKKQSWRDCSLSLVTYQPRVKQILAGPCYKWQPCLQAKK

>Potri.006G189700.1

MATGAAEMILKCIFSGSISLNDMEIRRRPYHRNCCKALHRLKDICS  
DACPKQRSISFPKKQVRSDHPLSIATSR LSSPSTADDSSMQNIGSLFA  
SETAITDNLN

>Dioal.03G029400 (*Dioscorea alata*)

MEAAQGLLQCVLDGCLSGFDDEIRRRPYHRNCSCALHRSEDKA  
HAHHCFASSKISFPLRGSWYHASISYSLMDYVRS

>GSMUA\_Achr5G22870\_001 (*Musa acuminata*)

MAAGAEGWIRCVLDGCISAFDSEIRRRPYHRNCSCALHKFRCSSR  
HDPCHAKISYPISLSSERLRITMPSSSSSSSCFTKAASDHGRGKIEEP  
WHLLQALEHFRCVGC
